# Supplementary material for: Anaemia in the first week may be associated with long-term mortality among critically ill patients: propensity score-based analyses
Source: Springer Nature journal article supplement (doi:10.1186/s12873-023-00806-w), 2023-03-22
Supplement: MOESM1 [file 24661876]

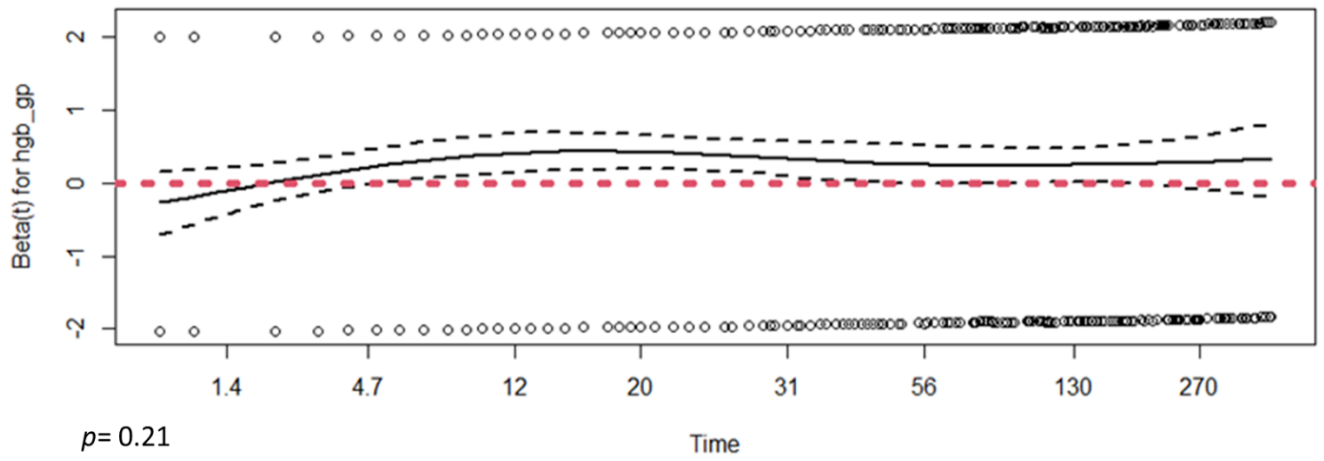

**Supplemental Figure 1. Schoenfeld residual plot to illustrate the correlation between the Schoenfeld residuals and survival time.**

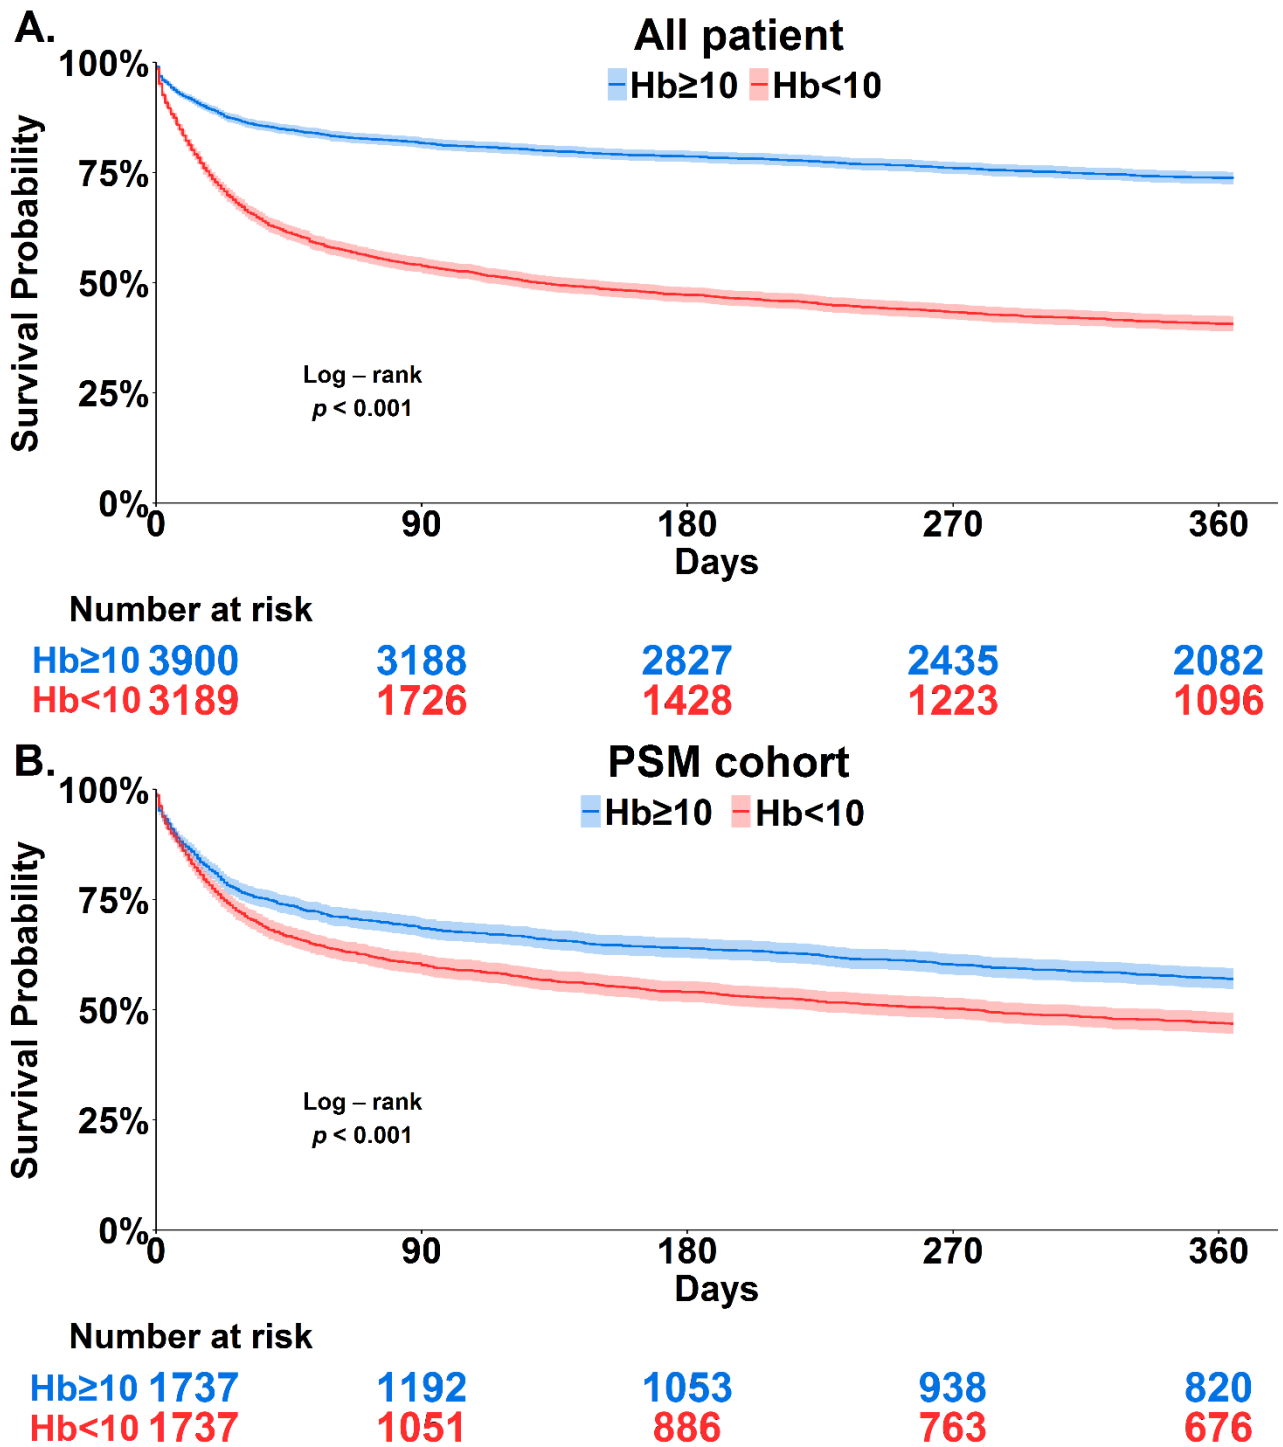

Supplemental Figure 2. Kaplan-Meier survival curves of critically ill patients whose week-1 hemoglobin higher and lower than 10 g/dL. (A) primary cohort with all of enrolled subjects, (B) propensity score-matched cohort. Abbreviations: Hb, haemoglobin (g/dL); PSM, propensity score-matching.
